# Supplementary material for: Sales of over-the-counter products containing codeine in 31 countries, 2013-2019: a retrospective observational study
Source: bioRxiv or medRxiv preprint supplement (doi:10.1101/2021.04.21.21255888), 2021-11-27
Supplement: Supplementary file [file media-1.pdf]

## Supplementary material

**Table S1:** Coverage of *IQVIA*'s data by country

| country      | % of the total market |
|--------------|-----------------------|
| Serbia       | 100                   |
| Slovenia     | 97                    |
| Latvia       | 92                    |
| Lithuania    | 92                    |
| Estonia      | 88                    |
| Canada       | 87                    |
| Germany      | 86                    |
| South Africa | 86                    |
| Bulgaria     | 85                    |
| Romania      | 85                    |
| Slovakia     | 85                    |
| Ireland      | 80                    |
| France       | 79                    |
| Poland       | 75                    |
| Switzerland  | 75                    |
| Argentina    | 73                    |
| Finland      | 73                    |
| Belgium      | 71                    |
| Croatia      | 67                    |
| UK           | 67                    |
| Russia       | 65                    |
| Mexico       | 61                    |
| Greece       | 60                    |
| Netherlands  | 58                    |
| Portugal     | 58                    |
| Japan        | 56                    |
| Brazil       | 53                    |
| Spain        | 48                    |
| USA          | 47                    |
| Italy        | 37                    |
| Thailand     | 22                    |

**Table S2:** Volume of OTC codeine-containing products sold and public expenditure between April 2013 and March 2019 in 31 countries

| <b>Country</b> | <b>mean units sold per 1000 (SD)</b> | <b>units sold per 1000 in 2018-19</b> | <b>mean public expenditure, £ per 1000 (SD)</b> | <b>public expenditure in 2018-19, £ per 1000</b> |
|----------------|--------------------------------------|---------------------------------------|-------------------------------------------------|--------------------------------------------------|
| Argentina      | 0.111 (0.19)                         | 0                                     | 0.002 (0.004)                                   | 0                                                |
| Belgium        | 497 (849)                            | 144                                   | 40 (40)                                         | 22.2                                             |
| Brazil         | 0.0018 (0.003)                       | 0.0006                                | 0.0004 (0.0008)                                 | 0.0002                                           |
| Bulgaria       | 2537 (163)                           | 2674                                  | 323 (40)                                        | 373                                              |
| Canada         | 117 (44)                             | 177                                   | 7 (6)                                           | 4                                                |
| Croatia        | 7084 (469)                           | 6407                                  | 1254 (93)                                       | 1276                                             |
| Estonia        | 5305 (1081)                          | 6658                                  | 1032 (273)                                      | 1413                                             |
| Finland        | 2996 (310)                           | 2575                                  | 106 (9)                                         | 100                                              |
| France         | 15717 (10558)                        | 313                                   | 743 (449)                                       | 31                                               |
| Germany        | 0.770 (0.18)                         | 1                                     | 0.136 (0.07)                                    | 0.262                                            |
| Greece         | 27 (16)                              | 11                                    | 1 (0.76)                                        | 0.608                                            |
| Ireland        | 23621 (2566)                         | 22860                                 | 5741 (624)                                      | 6636                                             |
| Italy          | 0.0068 (0.013)                       | 0                                     | 0.0018 (0.004)                                  | 0                                                |
| Japan          | 6870 (4780)                          | 10655                                 | 869 (659)                                       | 1466                                             |
| Latvia         | 15468 (682)                          | 15544                                 | 728 (178)                                       | 994                                              |
| Lithuania      | 865 (169)                            | 1091                                  | 266 (75)                                        | 372                                              |

|              |                |       |                 |       |
|--------------|----------------|-------|-----------------|-------|
| Mexico       | 221 (89)       | 341   | 8 (3)           | 12    |
| Netherlands  | 2668 (299)     | 2290  | 118 (10)        | 112   |
| Poland       | 6921 (598)     | 6893  | 491 (89)        | 593   |
| Portugal     | 0.007 (0.01)   | 0     | 0.0008 (0.001)  | 0     |
| Romania      | 2969 (191)     | 3151  | 329 (63)        | 429   |
| Russia       | 96 (41)        | 112   | 18 (8)          | 20    |
| Serbia       | 8505 (451)     | 7921  | 692 (79)        | 794   |
| Slovakia     | 1205 (74)      | 1214  | 323 (42)        | 374   |
| Slovenia     | 1364 (93)      | 1274  | 309 (24)        | 307   |
| South Africa | 31133 (3154)   | 37775 | 1266 (265)      | 1638  |
| Spain        | 0.0015 (0.004) | 0     | 0.0001 (0.0003) | 0     |
| Switzerland  | 5051 (1473)    | 3494  | 675 (80)        | 552   |
| Thailand     | 6 (3)          | 6     | 0.117 (0.06)    | 0.149 |
| UK           | 11500 (333)    | 11157 | 1599 (97)       | 1636  |
| USA          | 57 (26)        | 26    | 4 (1)           | 2     |

OTC: over-the-counter; SD: standard deviation

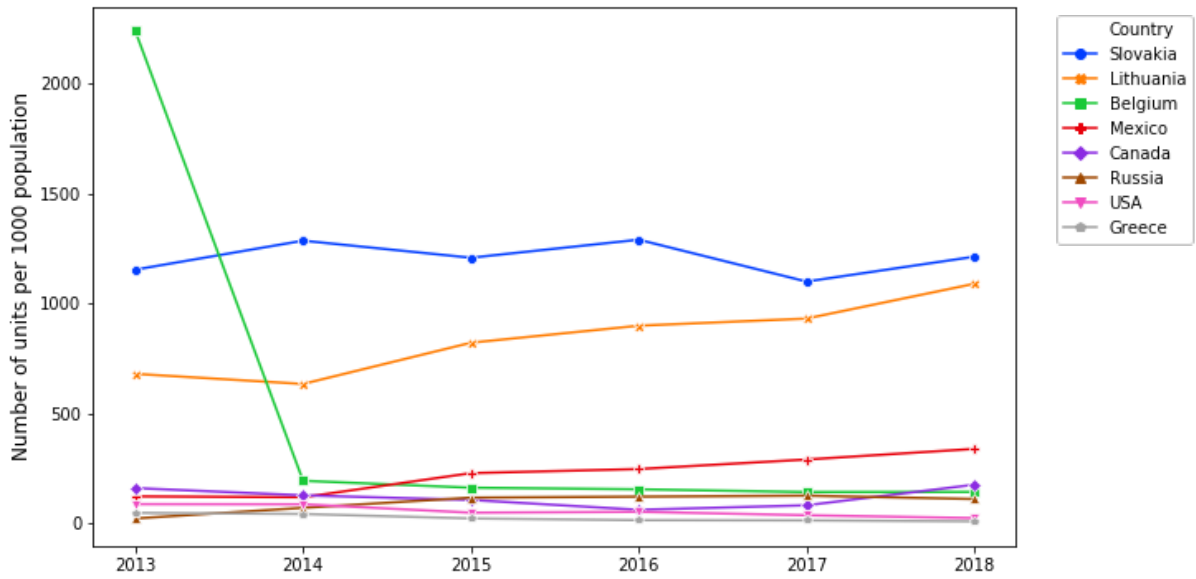

**Figure S1:** Over-the-counter products containing codeine sold per 1000 population starting in April 2013-March 2014, and ending in April 2018-March 2019, for countries in the third quartile of sales, based on their mean units sold per person.

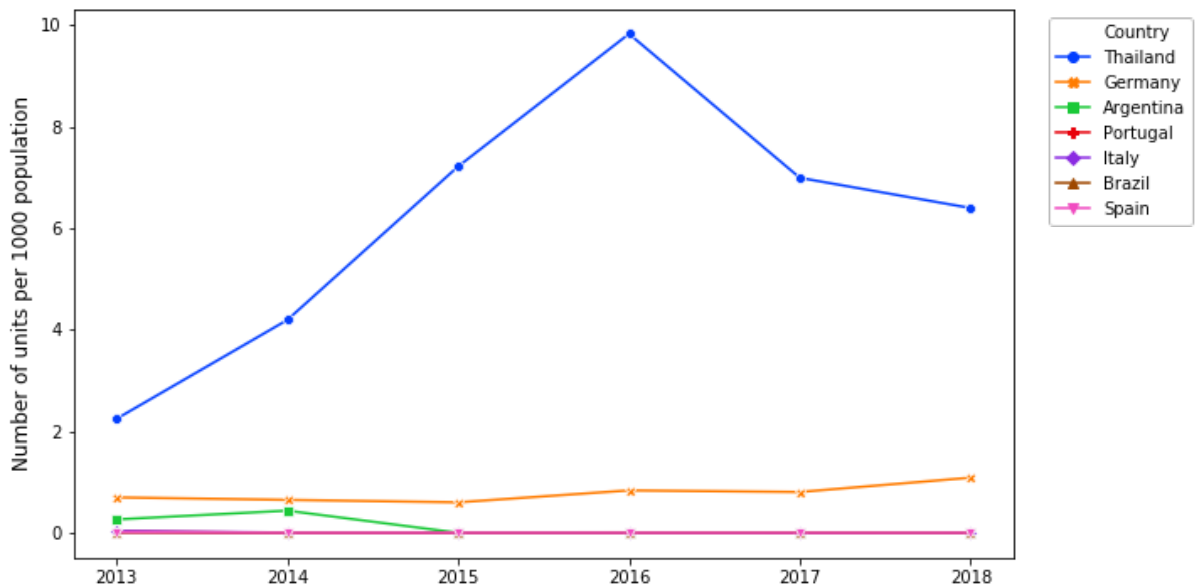

**Figure S2:** Over-the-counter products containing codeine sold per 1000 population starting in April 2013-March 2014, and ending in April 2018-March 2019, for countries in the last quartile of sales, based on their mean units sold per person.

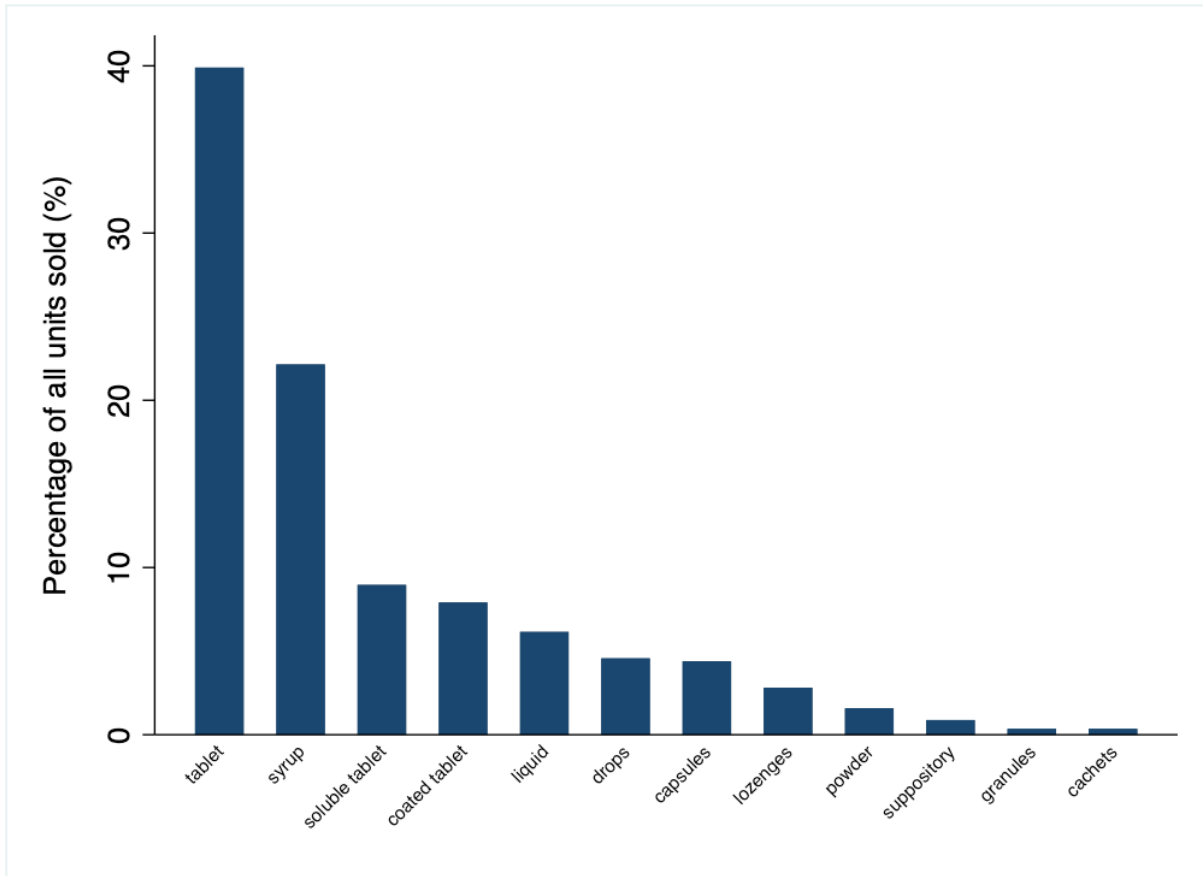

**Figure S3:** Percentage of all OTC codeine-containing units sold by formulation for 31 countries over six years (April 2013 to March 2019).
